# Supplementary material for: A metal-to-metal charge transfer induced green-yellow phosphor CsAlGe2O6:Bi3+ for full-spectrum LED devices
Source: Royal Society of Chemistry journal article supplement (doi:10.1039/d3dt01812a), 2023-01-01
Supplement: d3dt01812a1.pdf [file d3dt01812a1.pdf]

## Supporting Information

### Metal To Metal Charge Transfer Induced Yellow-Green Phosphor CsAlGe<sub>2</sub>O<sub>6</sub>: Bi<sup>3+</sup> for High Power LED Devices

Shuo Yang<sup>a</sup>, Chuqi Wang<sup>a</sup>, Xiaoxi Ma<sup>a</sup>, Chuang Wang<sup>a\*</sup>, Yujuan Dong<sup>a</sup>, Enlai Dong<sup>a</sup>,  
Ge Zhu<sup>b\*</sup>, Shuangyu Xin<sup>b\*</sup>

<sup>a</sup> College of Chemistry and Materials Engineering, Bohai University, Jinzhou, 121000, P. R.  
China.

<sup>b</sup> Key Laboratory of New Energy and Rare Earth Resource Utilization of State Ethnic Affairs  
Commission, College of Physics and Materials Engineering, Dalian Minzu University, 18 Liaohe  
West Road, Dalian, 116600, P. R. China.

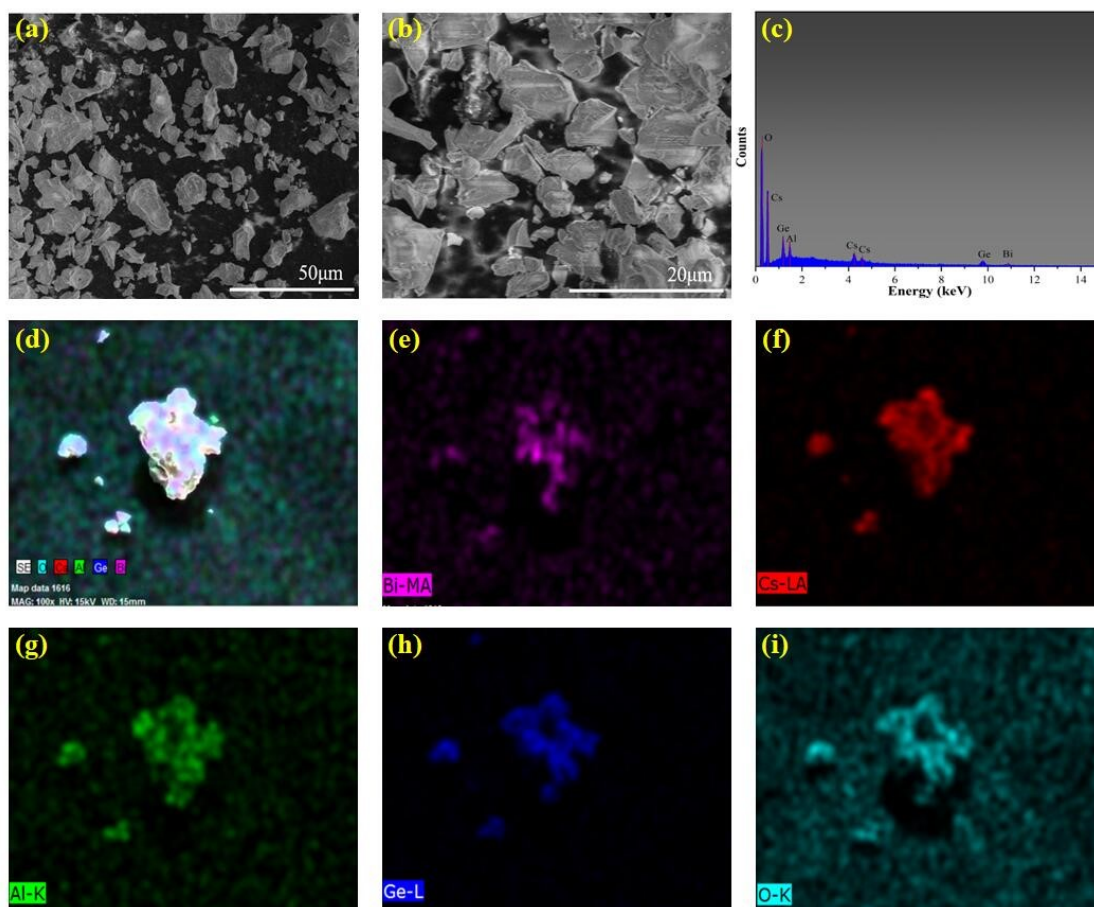

Figure S1. (a) and (b) the SEM spectra of CAGO samples. (c) the EDS spectrum of CAGO:  
3%Bi<sup>3+</sup> phosphor and (d)-(i) distribution diagram of element.

**Table S1** Crystal data and structure refinement for CsAlGe<sub>2</sub>O<sub>6</sub>

| Source           | Cu K $\alpha$ 1 X-rays             |
|------------------|------------------------------------|
| Chemical formula | CsAlGe <sub>2</sub> O <sub>6</sub> |
| Crystal system   | Cubic                              |
| Space group      | I-43d (220)                        |
| Cell parameters  | a = b = c = 13.904 Å               |
| Cell volume      | 2688.292 Å <sup>3</sup>            |
| Z                | 16                                 |

**Table S2** Atomic parameters

| Atom | Ox. | Wyck. | x/a       | y/b       | z/c       |
|------|-----|-------|-----------|-----------|-----------|
| Ge1  | 4   | 48e   | 0.1271(1) | 0.1685(1) | 0.4066(1) |
| Al1  | 3   | 48e   | 0.1271(1) | 0.1685(1) | 0.4066(1) |
| O1   | -2  | 48e   | 0.2380(5) | 0.1429(5) | 0.3563(6) |
| O2   | -2  | 48e   | 0.1194(5) | 0.2921(5) | 0.4266(4) |
| Cs1  | 1   | 16c   | 0.1143(1) | 0.1143(1) | 0.1143(1) |

**Table S3** Selected bond distances (Å) and angles (deg.) for CsAlGe<sub>2</sub>O<sub>6</sub>

| Vector     | Length | Angle         | Degrees |
|------------|--------|---------------|---------|
| Ge1/Al1-O1 | 1.7256 | Ge1/Al1-O1-O1 | 113.081 |
| Ge1/Al1-O1 | 1.7353 | Ge1/Al1-O1-O2 | 107.614 |
| Ge1/Al1-O2 | 1.7408 | Ge1/Al1-O1-O2 | 110.047 |
| Ge1/Al1-O2 | 1.7493 | Cs1-O2-O2     | 105.158 |
| Cs1-O1     | 3.8109 | Cs1-O2-O1     | 77.489  |
| Cs1-O2     | 3.6649 | Cs1-O2-O1     | 131.263 |
| Cs1-O2     | 3.0932 | -             | -       |
| Cs1-O1     | 3.5562 | -             | -       |

**Table S4** The specific CIE color coordinates and color temperature of CsAlGe<sub>2</sub>O<sub>6</sub>: Bi<sup>3+</sup>

| Sample                                                   | X      | y      | CCT (K) |
|----------------------------------------------------------|--------|--------|---------|
| CsAlGe <sub>2</sub> O <sub>6</sub> : 1%Bi <sup>3+</sup>  | 0.3339 | 0.4175 | 5504    |
| CsAlGe <sub>2</sub> O <sub>6</sub> : 3%Bi <sup>3+</sup>  | 0.3508 | 0.4512 | 5093    |
| CsAlGe <sub>2</sub> O <sub>6</sub> : 5%Bi <sup>3+</sup>  | 0.3600 | 0.4587 | 4891    |
| CsAlGe <sub>2</sub> O <sub>6</sub> : 7%Bi <sup>3+</sup>  | 0.3638 | 0.4619 | 4812    |
| CsAlGe <sub>2</sub> O <sub>6</sub> : 9%Bi <sup>3+</sup>  | 0.3722 | 0.4665 | 4641    |
| CsAlGe <sub>2</sub> O <sub>6</sub> : 11%Bi <sup>3+</sup> | 0.3756 | 0.4703 | 4581    |
